# Supplementary material for: Unveiling the orbital texture of 1T-TiTe2 using intrinsic linear dichroism in multidimensional photoemission spectroscopy
Source: Springer Nature journal article supplement (doi:10.1038/s41535-021-00398-3), 2021-11-15
Supplement: 41535_2021_398_MOESM1_ESM.pdf [file 41535_2021_398_MOESM1_ESM.pdf]

# Supplementary Information:

## Unveiling the Orbital Texture of 1T-TiTe<sub>2</sub> using Intrinsic Linear Dichroism in Multidimensional Photoemission Spectroscopy

Samuel Beaulieu,<sup>1,2,\*</sup> Michael Schüler,<sup>3,†</sup> Jakob Schusser,<sup>4,5</sup> Shuo Dong,<sup>2</sup> Tommaso Pincelli,<sup>2</sup> Julian Maklar,<sup>2</sup> Alexander Neef,<sup>2</sup> Friedrich Reinert,<sup>4</sup> Martin Wolf,<sup>2</sup> Laurenz Rettig,<sup>2</sup> Ján Minár,<sup>5,‡</sup> and Ralph Ernstorfer<sup>2,6,§</sup>

<sup>1</sup>Université de Bordeaux - CNRS - CEA, CELIA, UMR5107, F33405 Talence, France

<sup>2</sup>Fritz Haber Institute of the Max Planck Society, Faradayweg 4-6, 14195 Berlin, Germany

<sup>3</sup>Stanford Institute for Materials and Energy Sciences (SIMES),

SLAC National Accelerator Laboratory, Menlo Park, CA 94025, USA

<sup>4</sup>Experimentelle Physik VII and Würzburg-Dresden Cluster of Excellence ct.qmat, Universität Würzburg, Würzburg, Germany

<sup>5</sup>New Technologies-Research Center, University of West Bohemia, 30614 Pilsen, Czech Republic

<sup>6</sup>Institut für Optik und Atomare Physik, Technische Universität Berlin, 10623 Berlin, Germany

(Dated: October 13, 2021)

In Supplementary Figure 1, we compare *i*LDAD for bulk and monolayer 1T-TiTe<sub>2</sub>, calculated using the layer-resolved one-step model of photoemission described in the methods. The obtained *i*LDAD for the bulk and monolayer cases are almost identical. Indeed, the features at both  $\Gamma$  and M/M' points do not change when going from the monolayer case to the bulk limit. This striking observation gives us confidence that we can construct the TB model for a free-standing monolayer of 1T-TiTe<sub>2</sub> to get an intuitive picture about the orbital physics governing the emergence of the *i*LDAD.

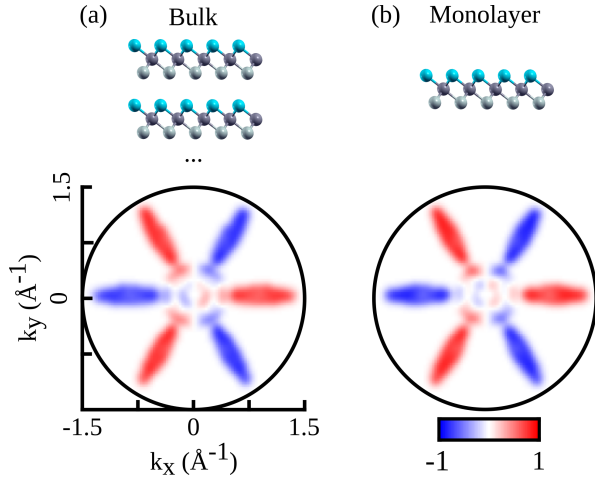

Supplementary Figure 1. **Layer-resolved *i*LDAD calculated within the KKR framework.** *i*LDAD for (a) bulk and (b) free-standing monolayer of 1T-TiTe<sub>2</sub> using 18.7 eV photon energy, and the same parameters as described in the methods.

To probe the bulk *i*LDAD spectrum, we performed corresponding calculations in the soft-x-ray regime. In Supplementary Figure 2 we show photon-energy dependence of the

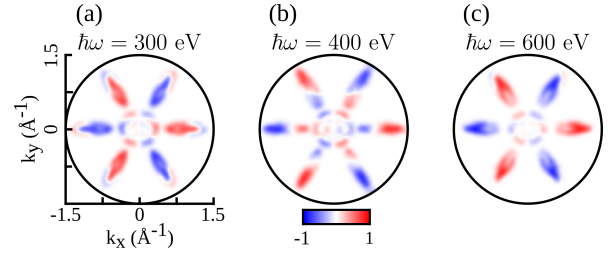

Supplementary Figure 2. **Soft-x-ray *i*LDAD calculated within the KKR framework for different photon energy.** *i*LDAD for bulk 1T-TiTe<sub>2</sub> has been calculated in the soft-x-ray regime at different photon energies (a) 300 eV, (b) 400 eV and (c) 600 eV.

*i*LDAD for bulk 1T-TiTe<sub>2</sub>, for 300 eV, 400 eV and 600 eV photon energies. The photon-energy-dependent trends from the XUV regime (see the main manuscript) are also recovered in the soft-x-ray regime. In particular, the dichroic features around the  $\Gamma$  point reverse sign when increasing the photon energy. However, the observed *i*LDAD at M and M' points, which is stable against variation of photon energy, further support the link between the in-plane orbital texture and *i*LDAD. Furthermore, we point out that by increasing the photon energy to the soft-x-ray regime, TRLEED final states approach free-electron-like character, and the corresponding approximation in the TB model is justified for *i*LDAD features around M and M' points.

Next, we show the procedure to extract the antisymmetric components of the dichroism (referred to as *intrinsic* Linear Dichroism in Photoelectron Angular Distributions - *i*LDAD) from photoemission data obtained from two crystal orientations rotated by 60° with respect to each other, for two different photon energies (18.7 eV and 21.7 eV). These data have been simulated using the one-step model (KKR) described in the manuscript.

\* samuel.beaulieu@u-bordeaux.fr

† schuele@stanford.edu

‡ jminar@ntc.zcu.cz

§ ernstorfer@fhi-berlin.mpg.de

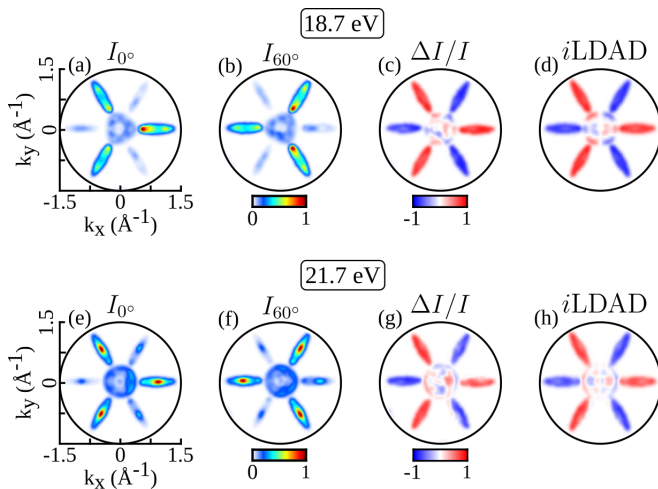

Supplementary Figure 3. **Extraction of the intrinsic Linear Dichroism in Photoelectron Angular Distributions (iLDAD) for different photon energies, calculated using the KKR framework:** (a)-(b) and (e)-(f)  $I_{0^\circ}$  and  $I_{60^\circ}$ , the CECs at the Fermi energy, calculated for two crystal orientations rotated by  $60^\circ$  with respect to each others, for 18.7 eV and 21.7 eV photon energies, respectively. (c) and (g)  $\Delta I/I$ , the raw normalized difference, *i.e.*  $(I_{0^\circ} - I_{60^\circ})/(I_{0^\circ} + I_{60^\circ})$  between CECs shown in (a)-(b), and (e)-(f), for 18.7 eV and 21.7 eV photon energies, respectively. (d) and (f) iLDAD represents the component of  $A_{LDAD}^{0^\circ/60^\circ}$  (see manuscript for more details) which is antisymmetric upon  $60^\circ$  azimuthal rotation of the crystal, for 18.7 eV and 21.7 eV photon energies, respectively.

As explained in the main text and in the methods section, we have constructed a tight-binding (TB) Hamiltonian based on projective Wannier functions. This procedure yields the Hamiltonian  $H_{j,j'}(\mathbf{k})$ , where  $j, j'$  run over the set of Te- $p$  and Ti- $d$  orbitals (11 orbitals in total). Diagonalizing  $H_{j,j'}(\mathbf{k})$  yields the eigenvalues  $\epsilon_n(\mathbf{k})$  and the associated eigenvectors  $[C_n(\mathbf{k})] = C_{jn}(\mathbf{k})$  (which enter Eq. (4), Eq. (6) and Eq. (9) in the main text).

The TB Hamiltonian is particularly useful for projecting onto specific orbitals. We define the orbital weight  $w_{jn}(\mathbf{k}) = |C_{jn}(\mathbf{k})|^2$ . Fig. (5) in the main text shows the orbital weight for

$j \in \{d_{z^2}, d_{xz}, d_{yz}\}$ . The Te- $p$  orbitals play only a minor role at the  $M/M'$  pockets at the Fermi energy, which is confirmed by Supplementary Figure 4(b). Contrasting the two paths in the Brillouin zone sketched in Fig/4(a), we note that the weight of the  $p_z$  orbitals is constant, while the  $p_x$  orbital has no contribution at  $M/M'$  for the path parallel to  $k_x$ . The weight of the  $p_y$  orbital changes only slightly when considering the rotated path.

Refs. [1, 2] attempted to explain the observed anisotropies in ARPES from the related compounds 1T-TaSe<sub>2</sub> and 1T-TaS<sub>2</sub> to a crystal-field splitting effect. We used the experimental geometry of the bulk system for all calculations, defined by the lattice constant  $a = 3.75 \text{ \AA}$  and the vertical distance between the Te layers of  $d_{\text{Te}} = 3.367 \text{ \AA}$ . In this geometry the crystal axes defined by the Ti-Te bonds, are non-orthogonal. Hence, the angular momentum is quenched, and the Ti- $d$  orbitals in the lab frame would be expressed by orbitals with different total angular momentum in the crystal-field basis. However, for a qualitative picture from the crystal-field point of view, we define the crystal-field axes in a modified geometry where bond directions are orthogonal (see Supplementary Figure 4(c)). This is achieved by reducing the Te layer distance to  $d'_{\text{Te}} = 3.054 \text{ \AA}$ . The resulting ligand configuration is identical to the octahedral complex; the  $d$  orbitals split into the  $e_g$  orbitals ( $d_{z^2}, d_{x^2-y^2}$ ) and  $t_{2g}$  orbitals ( $d_{xy}, d_{xz}, d_{yz}$ ) in the new coordinate system ( $x', y', z'$ ).

Inspecting the orbital weight in the crystal-field basis of Ti- $d$  orbitals (Supplementary Figure 4(d)) we find a qualitative difference between  $e_g$  and  $t_{2g}$  orbitals. The weight of the  $t_{2g}$  at the  $M/M'$  pockets is almost unchanged when rotating the path in momentum space by  $60^\circ$ , while the  $e_g$  orbitals are strongly affected. For the path parallel to the  $k_x$  direction (upper panels in Supplementary Figure 4(d)), the  $d_{x^2-y^2}$  orbital dominates, while for the rotated path the  $d_{z^2}$  transfers most of its weight to  $d_{z^2}$ . This analogous to the exchange of orbital weight between  $d_{xz}$  and  $d_{yz}$  orbitals in the lab frame discussed in the main text. The analysis in the crystal-field basis provides a complementary but ultimately not simpler picture, as the Bloch wavefunction contains notable contributions from both the  $e_g$  and  $t_{2g}$  orbitals.

- [1] M. M. Traum, N. V. Smith, F. J. Di Salvo, Angular dependence of photoemission and atomic orbitals in the layer compound 1T-TaSe<sub>2</sub>. *Phys. Rev. Lett.* **32**, 1241–1244 (1974).  
 [2] N. V. Smith, M. M. Traum, Angular-resolved ultraviolet photoe-

mission spectroscopy and its application to the layer compounds TaSe<sub>2</sub> and TaS<sub>2</sub>. *Phys. Rev. B* **11**, 2087–2108 (1975).

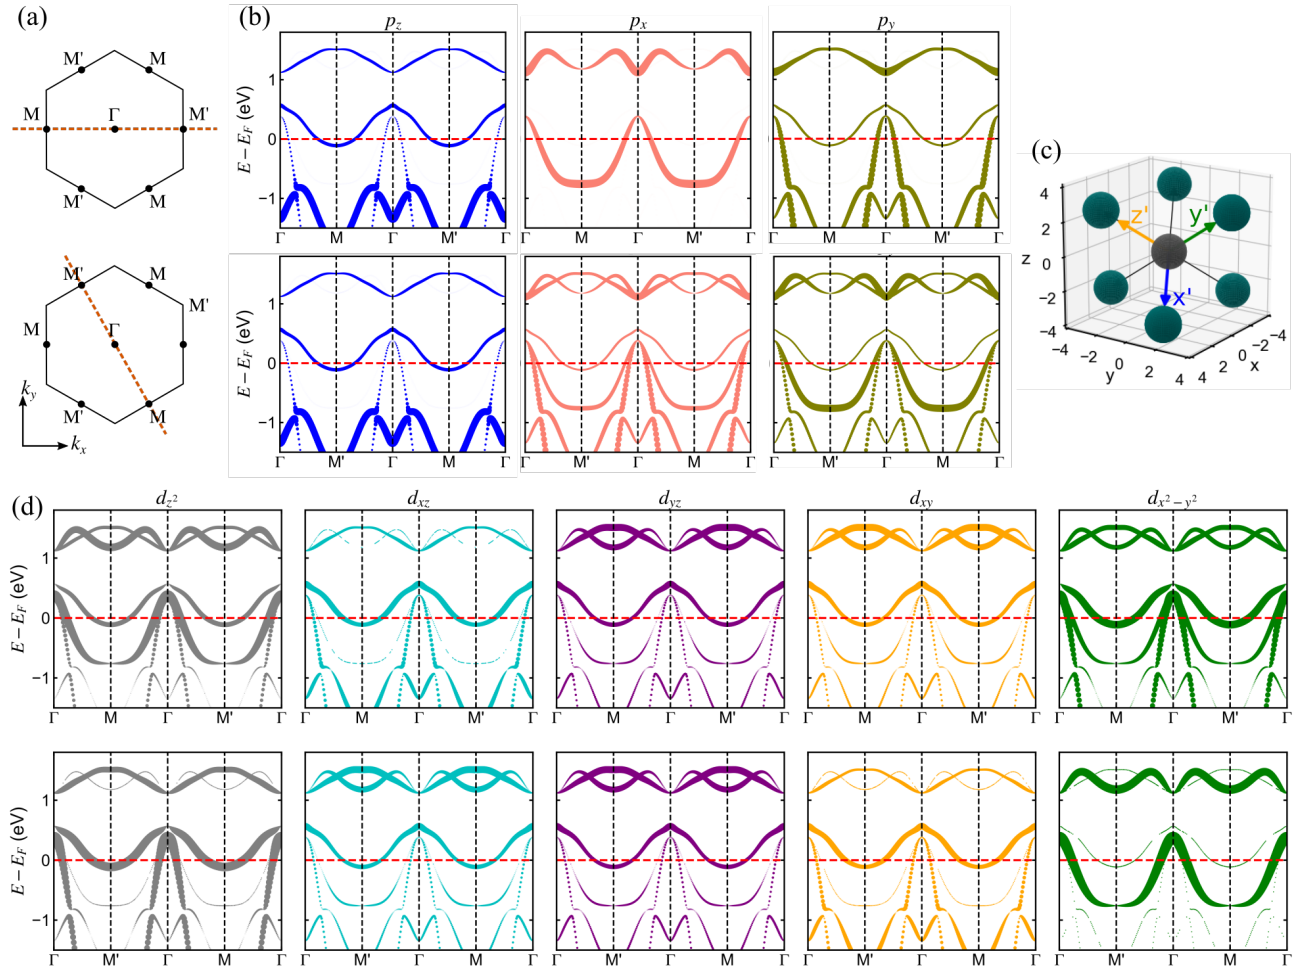

Supplementary Figure 4. **Orbital-projected band structure of monolayer 1T-TiTe<sub>2</sub>.** (a) Sketch of the first Brillouin zone the paths in momentum space along which the band structures have been calculated. (b) Analogous to Fig. (5) in the main text, the top (bottom) panels show the fat-band representation of the band structure along the path indicated in the top (bottom) in (a). The thickness represents the summed weight from both Te atoms in the unit cell. The scale of the thickness is identical to Fig. (5) in the main text. (c) Sketch of the modified geometry for defining the crystal-field coordinate system ( $x'$ ,  $y'$ ,  $z'$ ). (d) Fat-band representation of the band structure (analogous to (b)) in the crystal-field basis.
